# Supplementary material
Source: ML conference proceedings conference paper supplement (https://aclanthology.org/2022.acl-long.247)

**Upstream bias**  
Likelihood gap

**Fine-tuning  
dataset bias**  
Prevalance of  
she/her

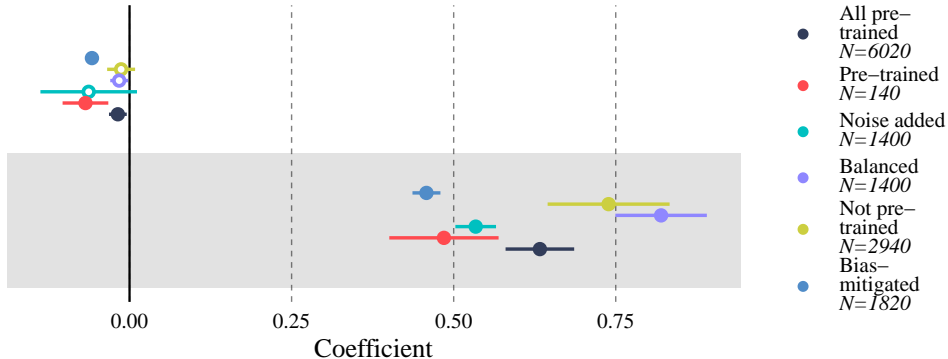

Supplement: software [file bios_forest.pdf › plots/bios_forest.pdf]

# Effect of upstream vs. fine-tuning dataset bias on down

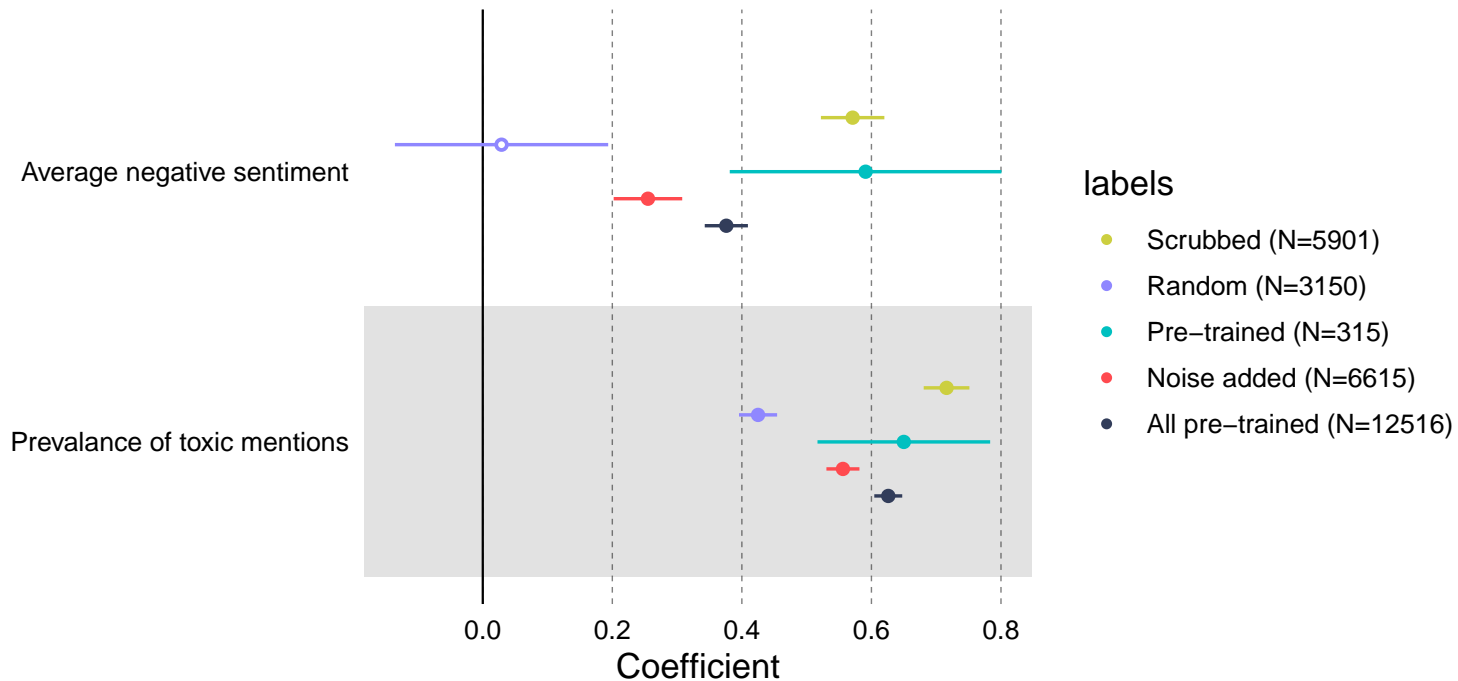

Supplement: software [file forest-wiki.pdf › plots/forest-wiki.pdf]

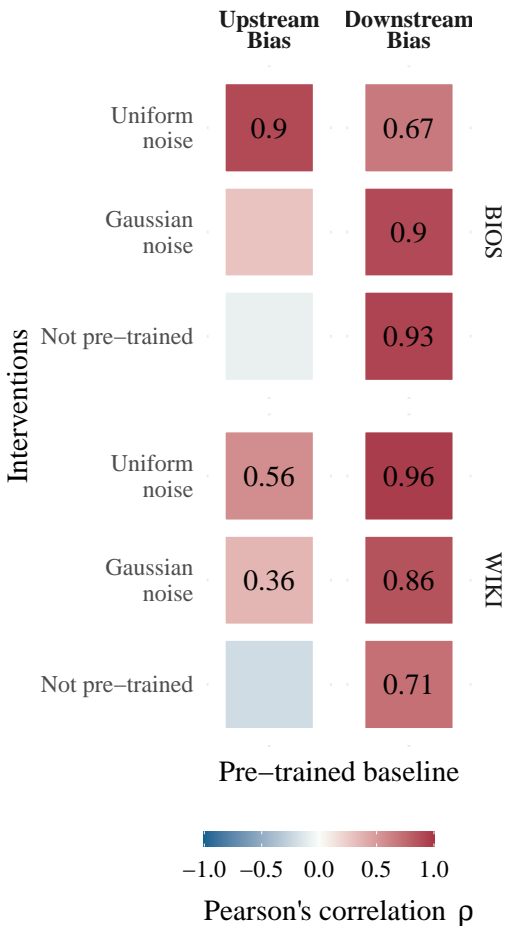

Supplement: software [file interventions.pdf › plots/interventions.pdf]

Downstream Bias (TPR ratio: she/her – he/him)

Upstream

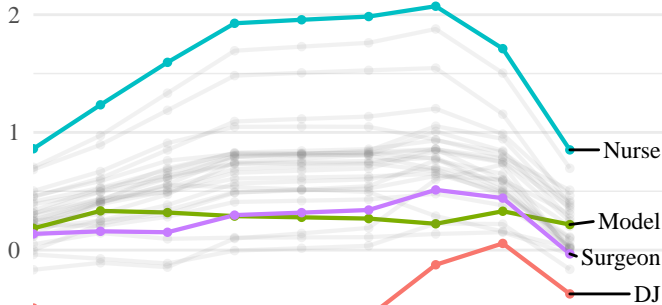

Downstream

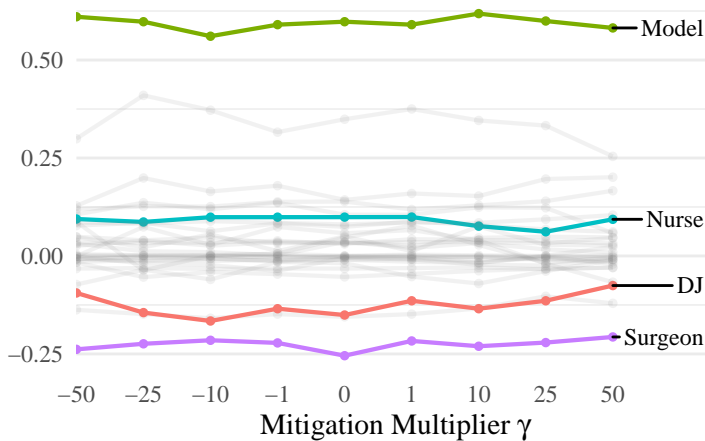

Supplement: software [file mitigation.pdf › plots/mitigation.pdf]

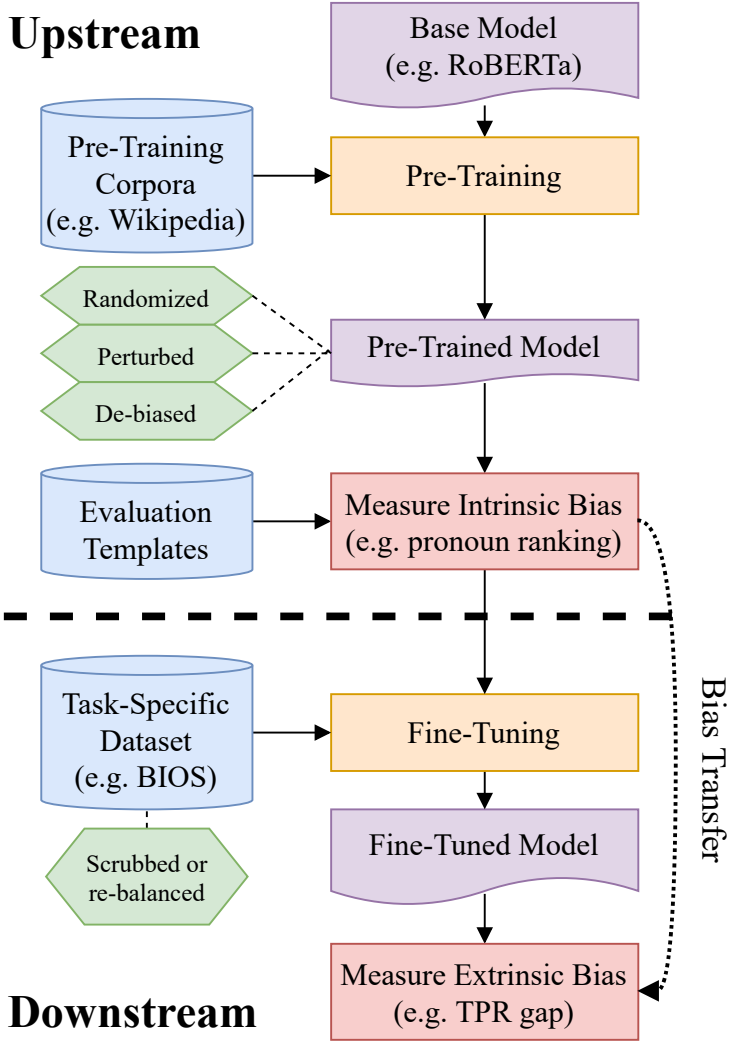

Supplement: software [file pipeline.pdf › plots/pipeline.pdf]

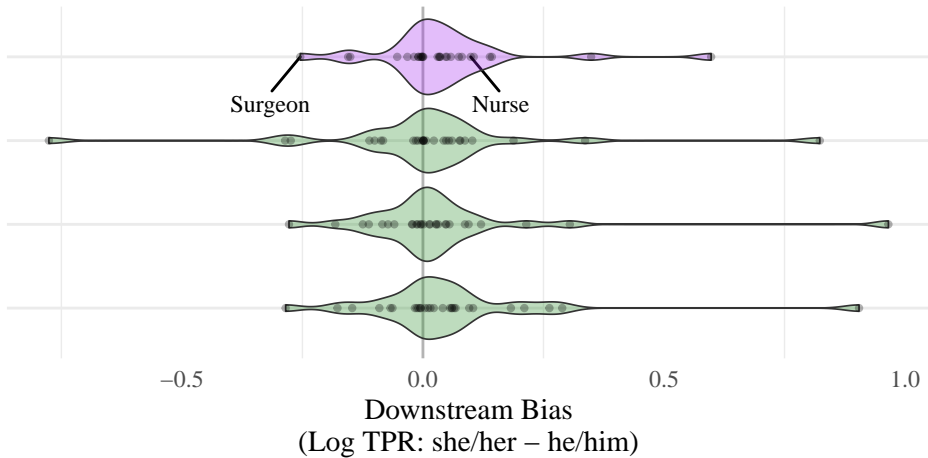

Supplement: software [file random_bios_downstream.pdf › plots/random_bios_downstream.pdf]

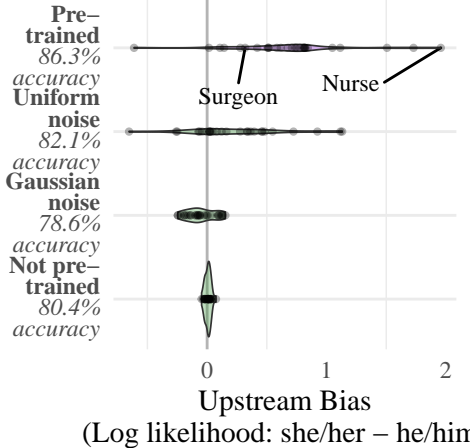

Supplement: software [file random_bios_upstream.pdf › plots/random_bios_upstream.pdf]

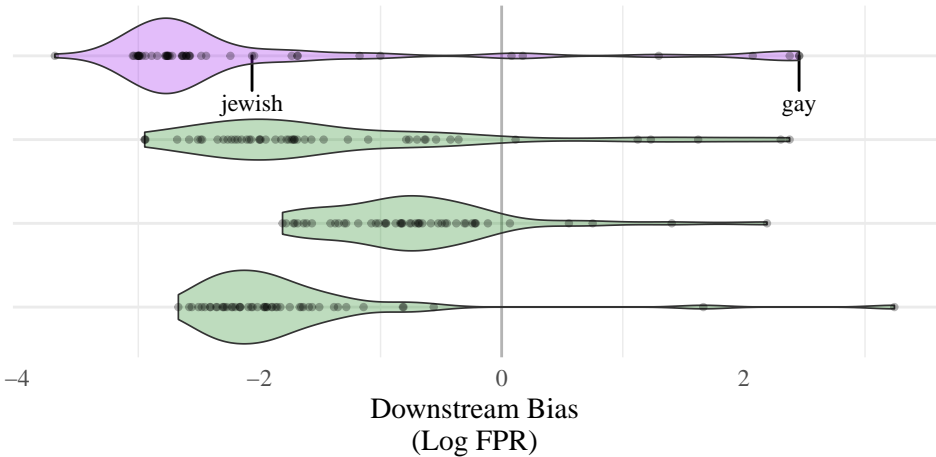

Supplement: software [file random_wiki_downstream.pdf › plots/random_wiki_downstream.pdf]

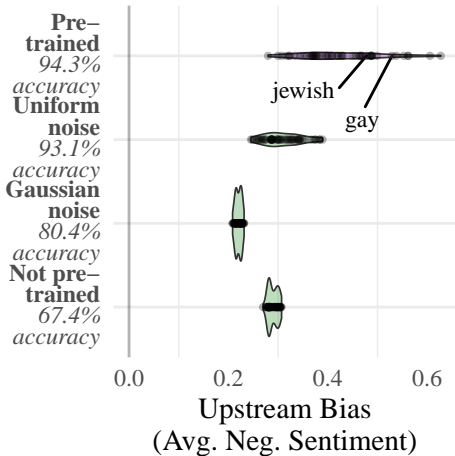

Supplement: software [file random_wiki_upstream.pdf › plots/random_wiki_upstream.pdf]

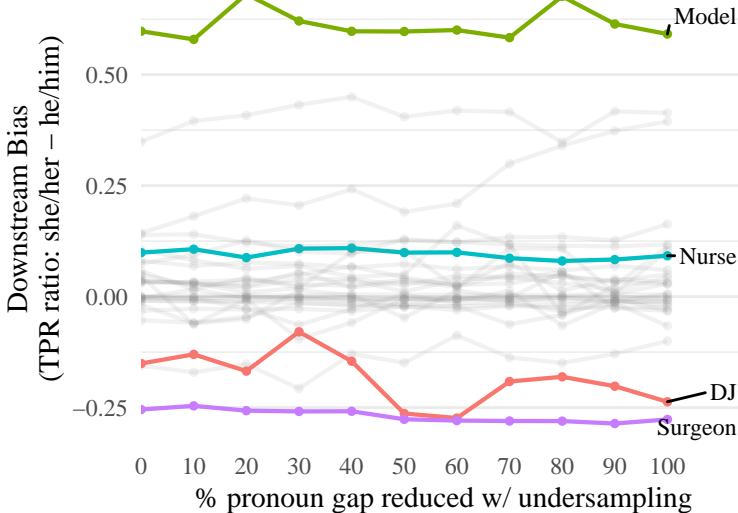

Supplement: software [file rebalancing.pdf › plots/rebalancing.pdf]

# Mentions Scrubbed

None

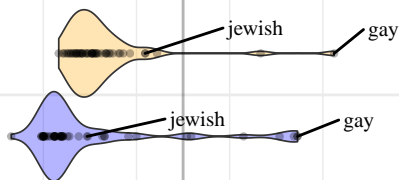

Toxic

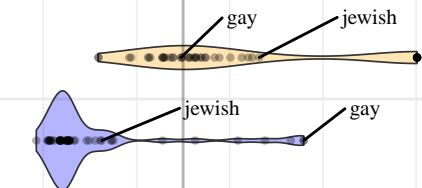

All

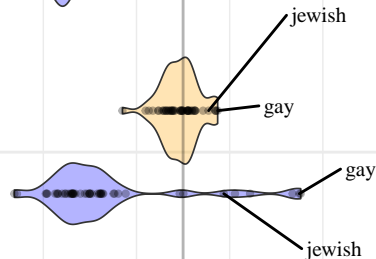

Downstream Bias (Log FPR ratio)

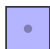

Pre-trained

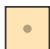

Not pre-trained

Supplement: software [file scrubbing.pdf › plots/scrubbing.pdf]

Downstream Bias (Log FPR ratio)

Pre-trained

Not pre-trained

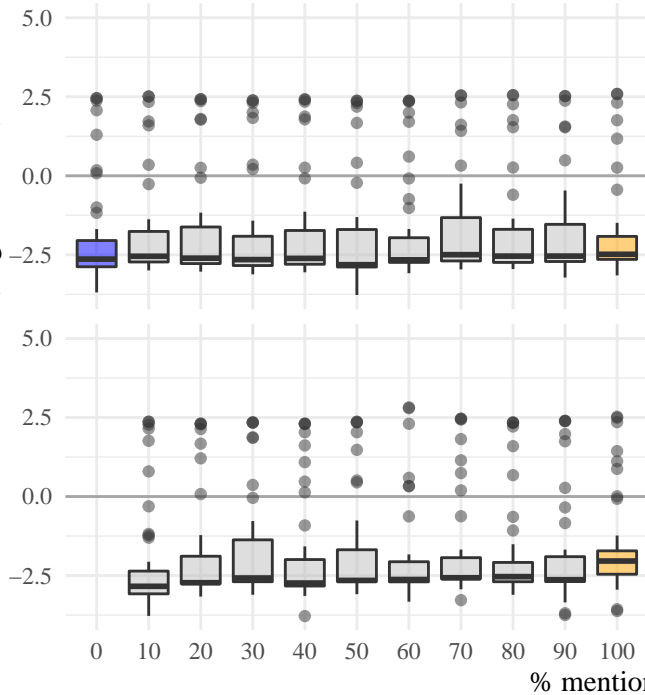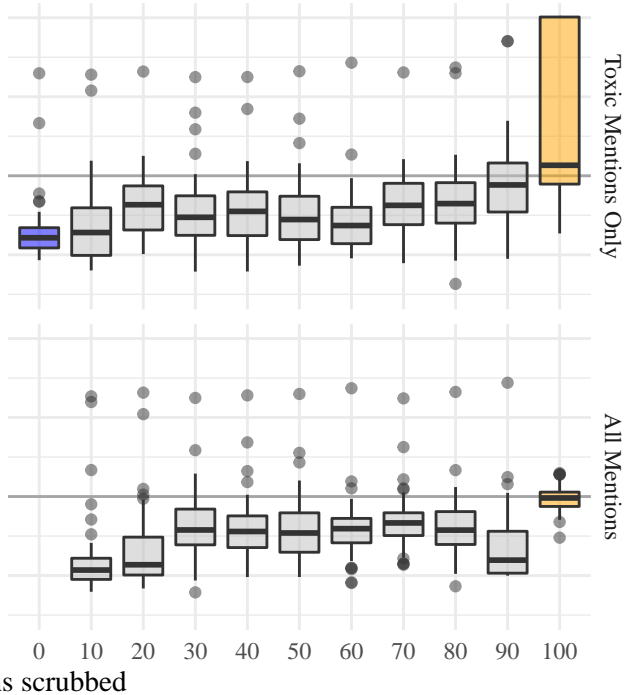

Supplement: software [file scrubbing_full.pdf › plots/scrubbing_full.pdf]

**Upstream bias**  
Avg. negative  
sentiment

**Fine-tuning  
dataset bias**  
Prevalance of  
toxic mentions

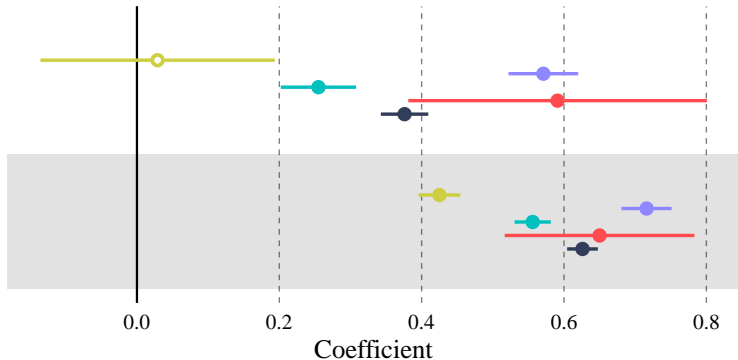

Supplement: software [file wiki_forest.pdf › plots/wiki_forest.pdf]
